# Supplementary material for: Evidence-Based Tracking of MDR E. coli from Bovine Endometritis and Its Elimination by Effective Novel Therapeutics
Source: MDPI journal article supplement (doi:10.3390/antibiotics10080997), 2021-08-18
Supplement: s1 [file s1]

## Supplementary Materials

**Table S1.** Drug combinations and dosage regimens.

| Combination Number | Drug A with Dose                             | Drug B with Dose                   |
|--------------------|----------------------------------------------|------------------------------------|
| i.                 | Co-amoxiclav<br>(1 mL/10 kg body weight, IM) | Gentamicin<br>(3.3 mg/kg BW, IM)   |
| ii.                | Oxytetracycline<br>(17 mg/kg BW)             |                                    |
| iii.               | Gentamicin<br>(6.6 mg/15 kg BW, IM)          | Enrofloxacin<br>(2.5 mg/kg BW, IM) |
| iv.                | Gentamicin<br>(6.6 mg/15 kg BW, IM)          |                                    |
| v.                 | Enrofloxacin<br>(20 mL, IU)                  | Metronidazole<br>(100 mL, IU)      |
| vi.                | Amoxicillin<br>(25mL, IU)                    | Streptomycin<br>(2g, IU)           |
| vii.               | Amoxicillin<br>(25mL, IU)                    | Metronidazole<br>(100 mL, IU)      |
| viii.              | Amoxicillin<br>(25mL, IU)                    | Gentamicin<br>(10mL, IU)           |

BW, body weight; IM, intramuscular; IU, Intrauterine.

**Table S2.** MIC comparison of tested antibiotics against *E. coli*.

| Antibiotics     | Mean + Std.  | 95% Confidence Interval for Mean |             | <i>p</i> -value |
|-----------------|--------------|----------------------------------|-------------|-----------------|
|                 |              | Lower Bound                      | Upper Bound |                 |
| Amoxicillin     | 13.54+4.77   | 8.5322                           | 18.5512     | 0.0000          |
| Calamox         | 7.70+4.40    | 3.0819                           | 12.3261     |                 |
| Metronidazole   | 166.67+75.69 | 87.2336                          | 246.0998    |                 |
| Enrofloxacin    | 2.20+1.37    | 0.7705                           | 3.6403      |                 |
| Streptomycin    | 11.59+4.11   | 7.2718                           | 15.9053     |                 |
| Gentamicin      | 3.02+2.55    | 0.3447                           | 5.6937      |                 |
| Oxytetracycline | 17.07+7.78   | 8.9102                           | 25.2333     |                 |

|       |                                                             |     |
|-------|-------------------------------------------------------------|-----|
| Seq   | ATCAACCGAGATTCCCCAGTAGCGGCGAGCGAACGGGGAGGAGCCCAGAGCCTGAATCA | 60  |
| Seq1  | ATCAACCGAGATTCCCCAGTAGCGGCGAGCGAACGGGGAGGAGCCCAGAGCCTGAATCA | 60  |
| Seq2  | ATCAACCGAGATTCCCCAGTAGCGGCGAGCGAACGGGGAGGAGCCCAGAGCCTGAATCA | 60  |
| Seq3  | ATCAACCGAGATTCCCCAGTAGCGGCGAGCGAACGGGGAGGAGCCCAGAGCCTGAATCA | 60  |
| Seq4  | ATCAACCGAGATTCCCCAGTAGCGGCGAGCGAACGGGGAGGAGCCCAGAGCCTGAATCA | 60  |
| ***** |                                                             |     |
| Seq   | GTGTGTGTGTTAGTGGAAGCGTCTGGAAAGGCGCGGATACAGGGTGACAGCCCCGTACA | 120 |
| Seq1  | GTGTGTGTGTTAGTGGAAGCGTCTGGAAAGGCGCGGATACAGGGTGACAGCCCCGTACA | 120 |
| Seq2  | GTGTGTGTGTTAGTGGAAGCGTCTGGAAAGGCGCGGATACAGGGTGACAGCCCCGTACA | 120 |
| Seq3  | GTGTGTGTGTTAGTGGAAGCGTCTGGAAAGGCGCGGATACAGGGTGACAGCCCCGTACA | 120 |
| Seq4  | GTGTGTGTGTTAGTGGAAGCGTCTGGAAAGGCGCGGATACAGGGTGACAGCCCCGTACA | 120 |
| ***** |                                                             |     |
| Seq   | CAAAAAAATGCACATACTGTGAGCTCGATGAGTAGGGCGGGACACGTGGTATCCTGTCT | 180 |
| Seq1  | CAAAAAAATGCACATACTGTGAGCTCGATGAGTAGGGCGGGACACGTGGTATCCTGTCT | 180 |
| Seq2  | CAAAAAAATGCACATACTGTGAGCTCGATGAGTAGGGCGGGACACGTGGTATCCTGTCT | 180 |
| Seq3  | CAAAAAAATGCACATACTGTGAGCTCGATGAGTAGGGCGGGACACGTGGTATCCTGTCT | 180 |
| Seq4  | CAAAAAAATGCACATACTGTGAGCTCGATGAGTAGGGCGGGACACGTGGTATCCTGTCT | 180 |
| ***** |                                                             |     |
| Seq   | GAATATGGGGGACCATCCTCCAAGGCTAAATACTCCTGACTGACCGATAGTGA       | 233 |
| Seq1  | GAATATGGGGGACCATCCTCCAAGGCTAAATACTCCTGACTGACCGATAGTGA       | 233 |
| Seq2  | GAATATGGGGGACCATCCTCCAAGGCTAAATACTCCTGACTGACCGATAGTGA       | 233 |
| Seq3  | GAATATGGGGGACCATCCTCCAAGGCTAAATACTCCTGACTGACCGATAGTGA       | 233 |
| Seq4  | GAATATGGGGGACCATCCTCCAAGGCTAAATACTCCTGACTGACCGATAGTGA       | 233 |
| ***** |                                                             |     |

**Figure S1.** Multiple sequence alignment of *E. coli* 23S ribosomal protein (reference and local isolates PK nucleotide sequences).

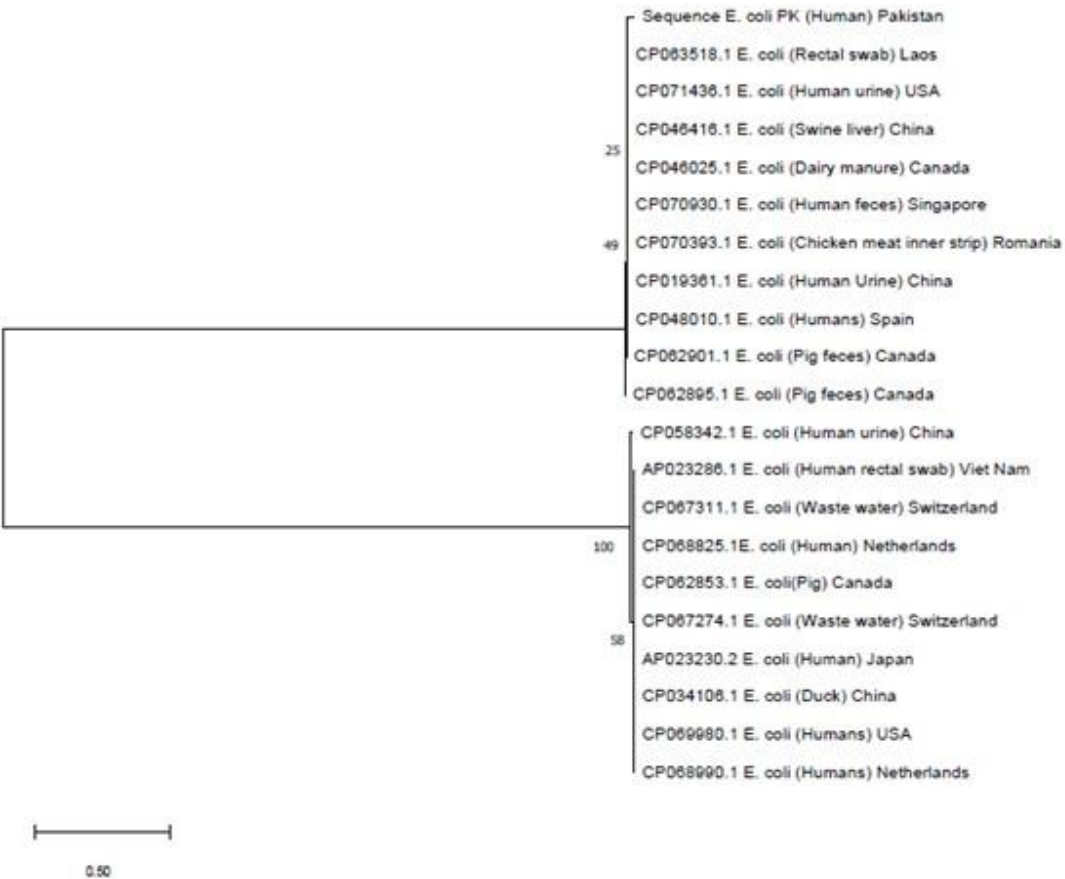

**Figure S2.** Phylogenetic tree of *E. coli* 23S ribosomal gene (nucleotide sequences). Analysis has been performed among different source samples of *E. coli* 23S ribosomal gene from different countries with our isolated sequenced samples. The branch length (numbers) are representing the nucleotide substitutions per 100 nucleotide sites.

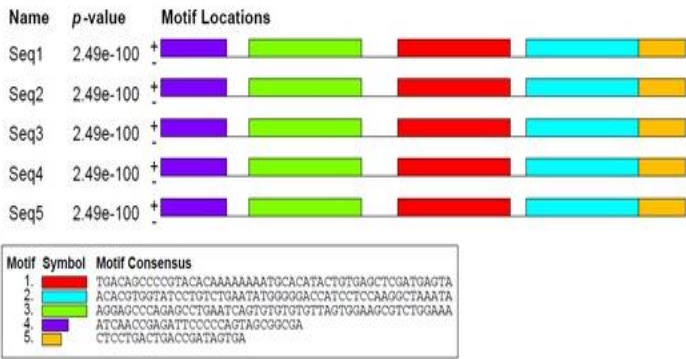

**Figure S3.** Motifs locations in gene sequences (1 to 5), sequence of individual motif and *p*-value of motifs in sequence 1 to 5.

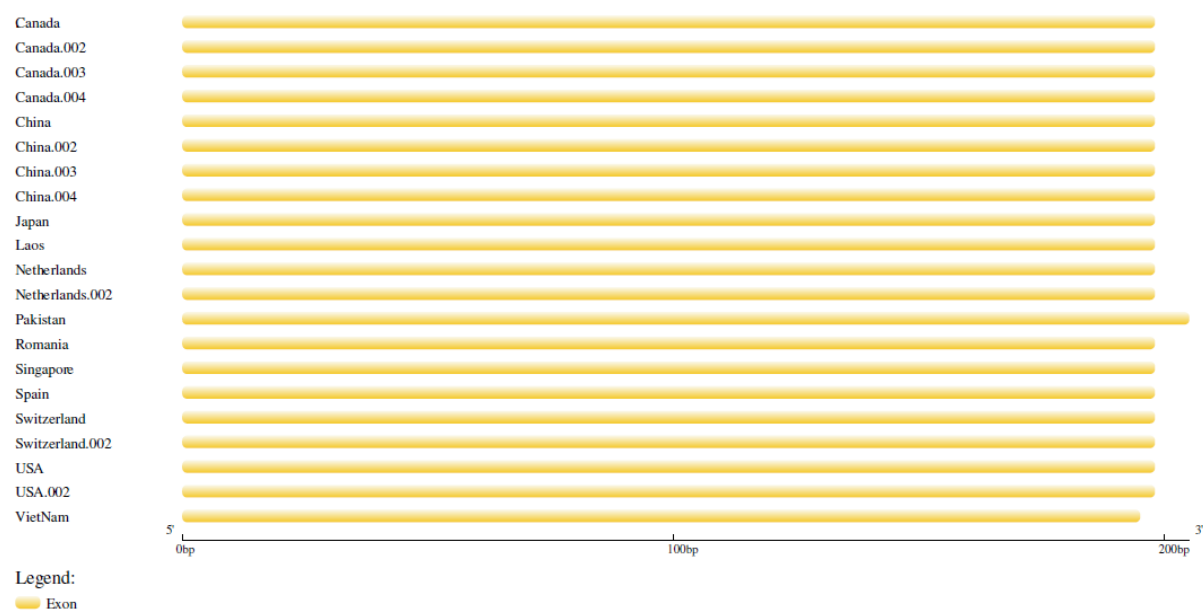

**Figure S4.** Structural analysis of 23S *E. coli* ribosomal gene from Pakistan.
